# Supplementary material
Source: PubMed Central journal article supplement (PMC27655)
Supplement: pnas_97_18_10008__6.pdf [file pnas_97_18_10008__6.pdf]

# *L. monocytogenes*

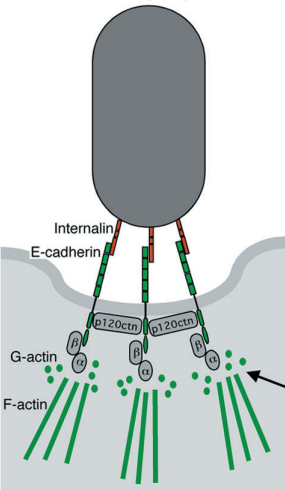

Internalin—E-cadherin mediated internalization

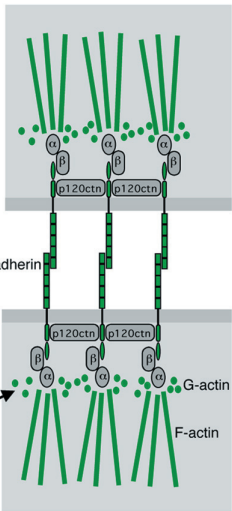

E-cadherin—E-cadherin mediated cell-cell adhesion

Actin polymerization
