# Supplementary material
Source: PubMed Central journal article supplement (PMC27655)

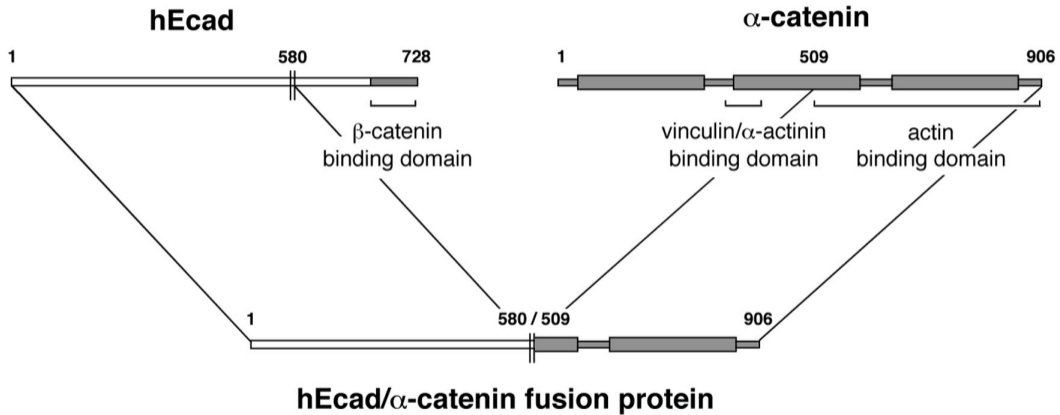

Supplement: pnas_97_18_10008__4.pdf [file pnas_97_18_10008__4.pdf]

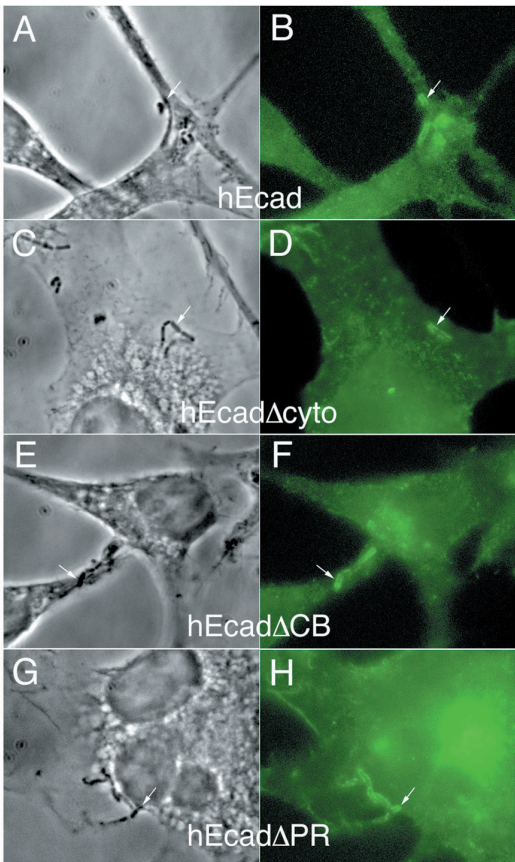

Supplement: pnas_97_18_10008__5.pdf [file pnas_97_18_10008__5.pdf]
